# Supplementary material for: DeepCPI: A Deep Learning-based Framework for Large-scale in silico Drug Screening
Source: PubMed Central journal article supplement — Genomics Proteomics Bioinformatics. 2020 Feb 6;17(5):478–95. doi: 10.1016/j.gpb.2019.04.003 (PMC7056933; doi:10.1016/j.gpb.2019.04.003), 2020-02-06
Supplement: mmc4.pdf [file mmc4.pdf]

## AUROC

A

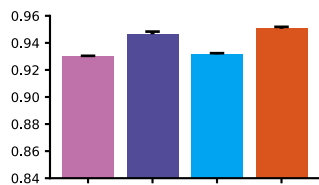

## AUPRC

B

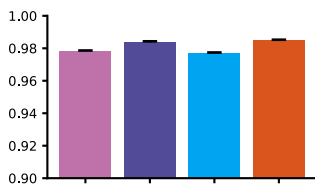

Training: 20% randomly selected pairs from ChEMBL  
Test: The remaining pairs from ChEMBL

C

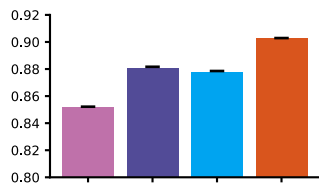

D

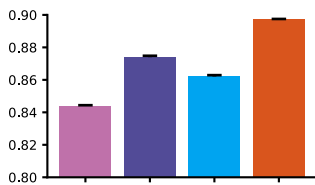

Training: Non-unique pairs from ChEMBL  
Test: Unique pairs from ChEMBL

E

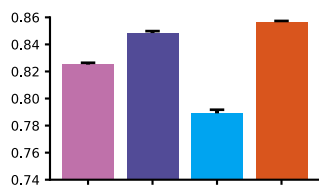

F

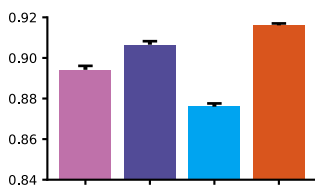

Training: ChEMBL  
Test: BindingDB (overlaps with training data were removed)

SLNN

Random forest

DNN with conventional features

DeepCPI
