# Supplementary figures and images for: DeepCPI: A Deep Learning-based Framework for Large-scale in silico Drug Screening
Source: PubMed Central journal article supplement — Genomics Proteomics Bioinformatics. 2020 Feb 6;17(5):478–95. doi: 10.1016/j.gpb.2019.04.003 (PMC7056933; doi:10.1016/j.gpb.2019.04.003), 2020-02-06

## Training phase

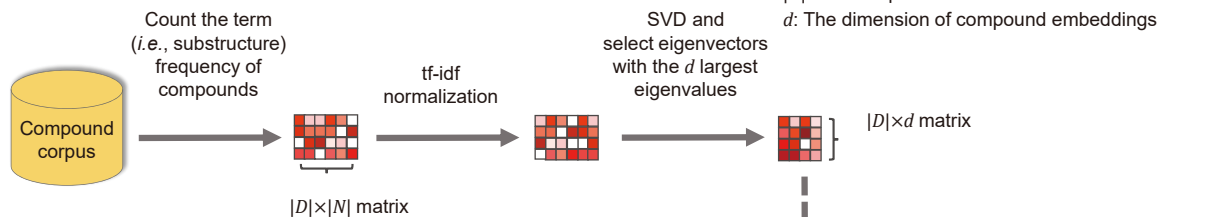

## Predicting phase

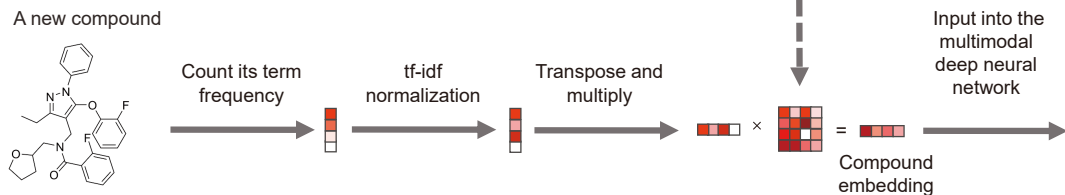

Supplement: mmc1.pdf [file mmc1.pdf]

### Training phase

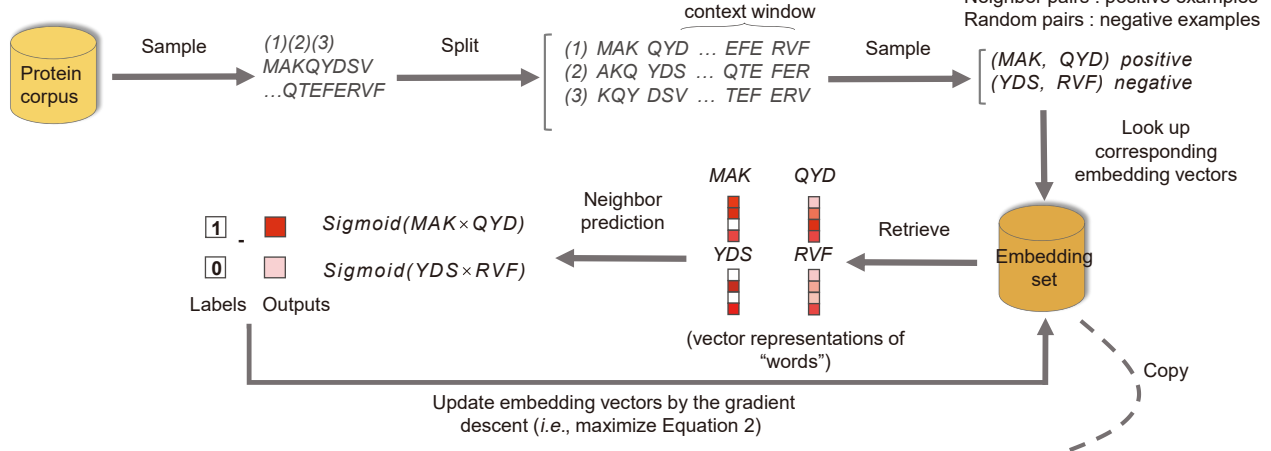

### Predicting phase

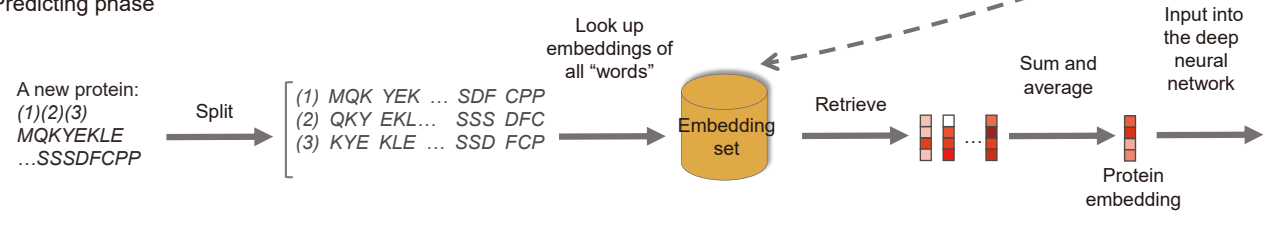

Supplement: mmc2.pdf [file mmc2.pdf]

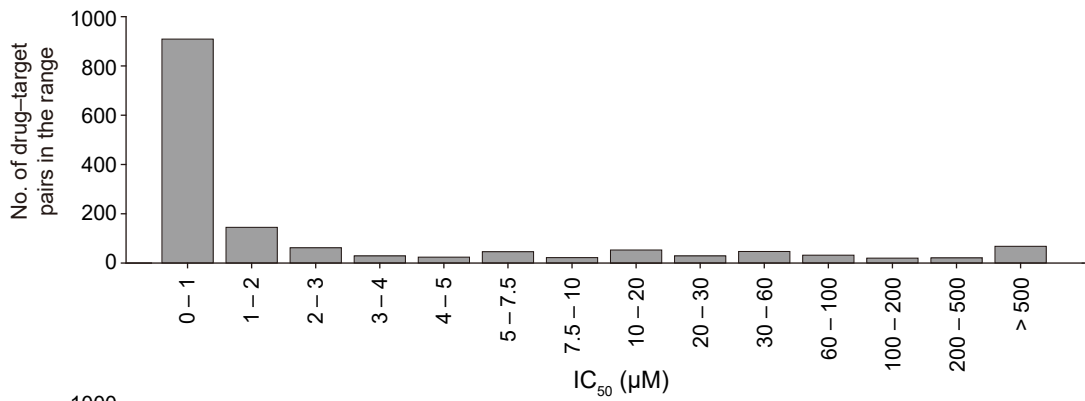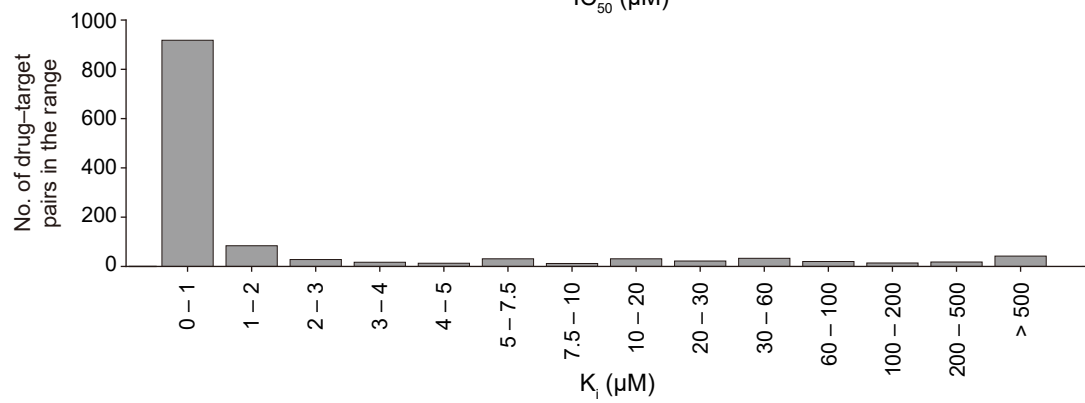

Supplement: mmc3.pdf [file mmc3.pdf]

A Original input features

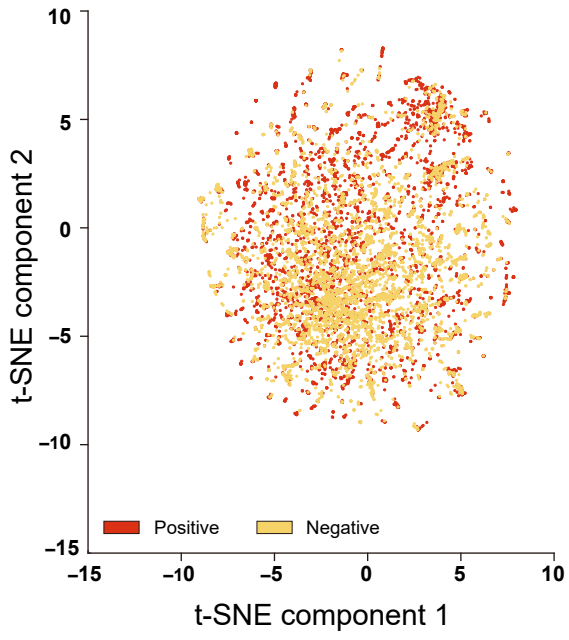

B Features represented by the last hidden layer of DNN

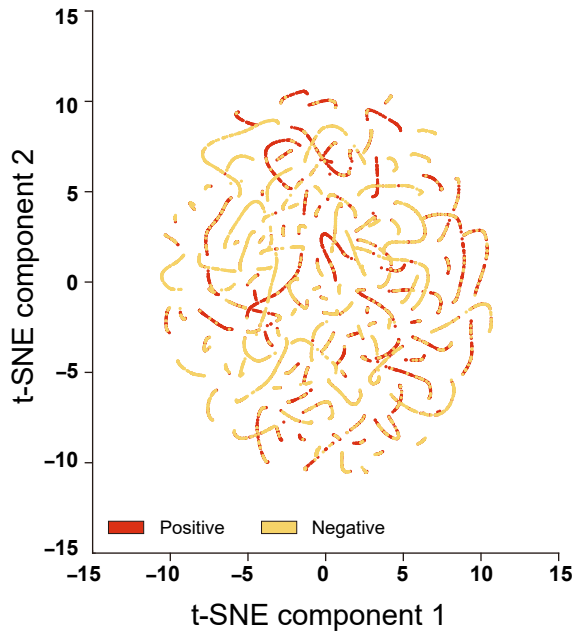

Supplement: mmc5.pdf [file mmc5.pdf]

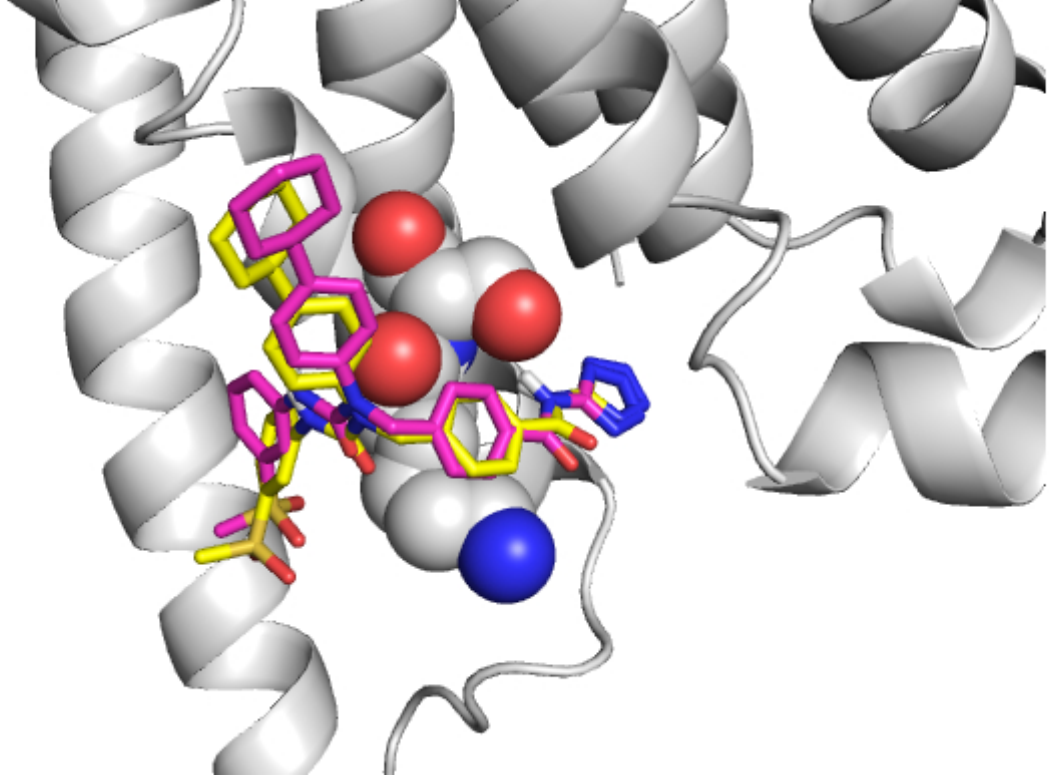

Supplement: mmc6.pdf [file mmc6.pdf]

A JK0580-H009

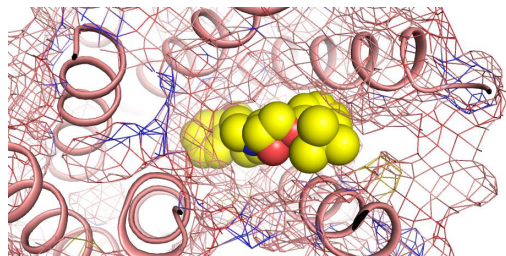

B CD3878-F005

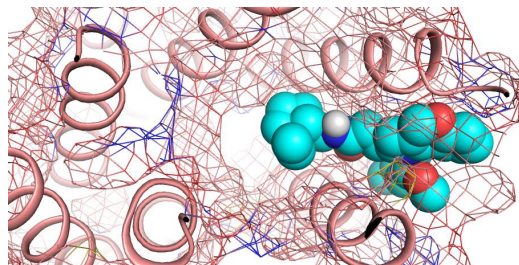

C CD3293-E005

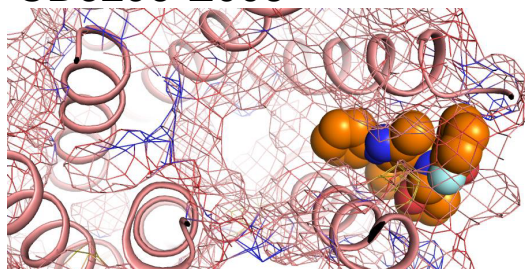

Supplement: mmc7.pdf [file mmc7.pdf]
